# Supplementary material for: A pH responsive fluorescent probe based on dye modified i-motif nucleic acids
Source: Royal Society of Chemistry journal article supplement (doi:10.1039/c8ob02885k), 2018-01-01
Supplement: c8ob02885k1.pdf [file c8ob02885k1.pdf]

# AIE Dye Mono-Functionalized i-Motif Forming Nucleic Acids for pH-Responsive Fluorescence Probe

Pan Li,<sup>a,†</sup> Zhe Chen,<sup>a,c,†</sup> Yishun Huang,<sup>a</sup> Jing Li,<sup>a</sup> Fan Xiao,<sup>a</sup> Shiyao Zhai,<sup>a</sup> Zhiming Wang,<sup>\*b</sup> Xuan-Jun Zhang<sup>\*c</sup> and Leilei Tian<sup>\*a</sup>

<sup>a</sup>. Department of Materials Science and Engineering, Southern University of Science and Technology, 1088 Xueyuan Blvd., Nanshan District, Shenzhen, Guangdong 518055, China. E-mail: [tianll@sustc.edu.cn](mailto:tianll@sustc.edu.cn)

<sup>b</sup>. HKUST-Shenzhen Research Institute, The Hong Kong University of Science & Technology (HKUST), Shenzhen, Guangdong 518057, China. E-mail: [zhimingwang@ust.hk](mailto:zhimingwang@ust.hk)

<sup>c</sup>. Faculty of Health Sciences, University of Macau, Taipa 999078, Macau, China. E-mail: [xuanjunzhang@umac.mo](mailto:xuanjunzhang@umac.mo)

† There authors contributed equally to this work.

## 1. Synthesis of IFS-TPE-1 and IFS-TPE-2.

### 1.1 Synthesis of alkyne terminated DNA strands.

**Table S1.** DNA Sequences used in this work

| Name               | Sequence (from 5' to 3')                                                             |
|--------------------|--------------------------------------------------------------------------------------|
| IFS                | CCC TAA CCC TAA CCC TAA CCC                                                          |
| Functionalized IFS | alkyne-CCC TAA CCC TAA CCC TAA CCC                                                   |
| RS                 | GTG TTA GTG TTA GTG AAA AAA                                                          |
| Functionalized RS  | alkyne-GTG TTA GTG TTA GTG AAA AAA                                                   |
| RS-TPE-1           | 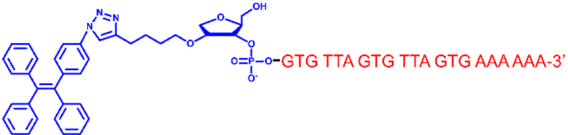 |

## 1.2 Synthesis of IFS-TPE-1 and IFS-TPE-2 through solid phase “click reaction”

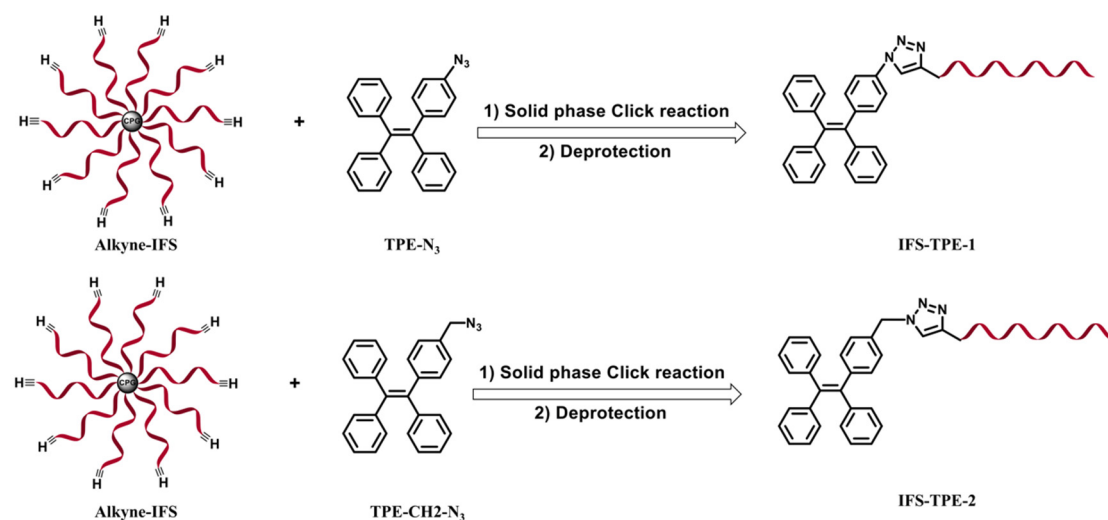

**Scheme S1.** Solid-phase “click” chemistry approach for the synthesis of IFS-TPE-1 and IFS-TPE-2.

## 1.3 Purification of IFS-TPE-1 and IFS-TPE-2.

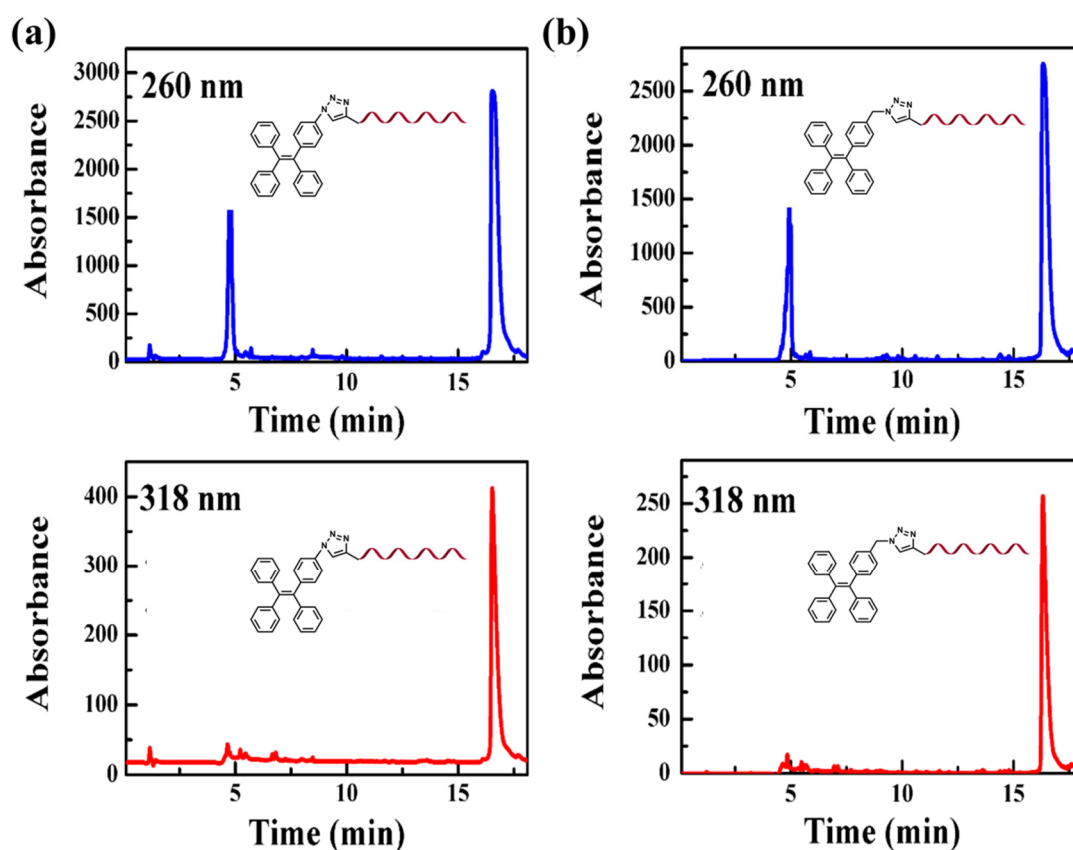

**Figure S1.** Reverse phase-HPLC analysis of IFS-TPE-1 (a) and IFS-TPE-2 (b) with absorbance at both 260 nm and 318 nm. Retention time of target molecule lies at 17.0 min.

#### 1.4 MALDI-TOF characterization.

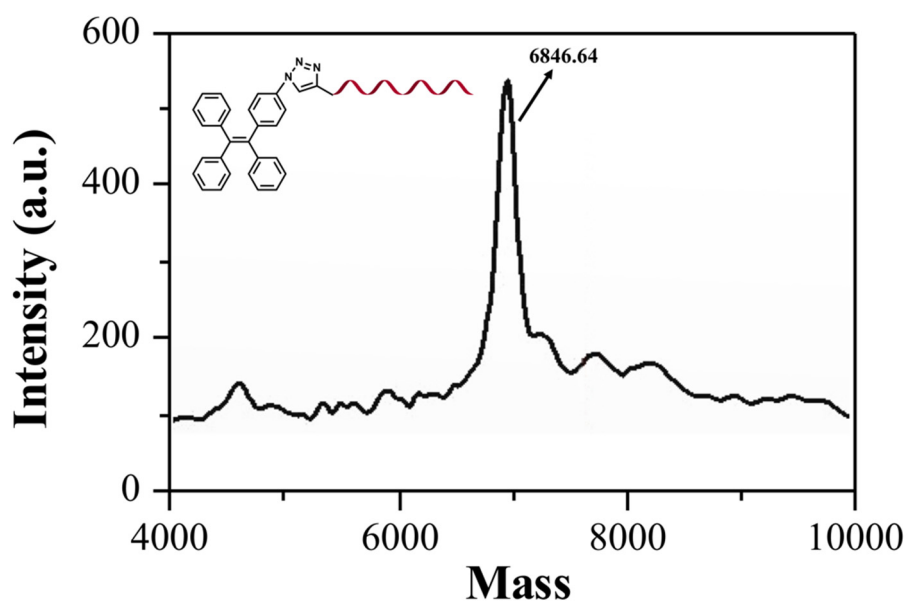

**Figure S2.** Chemical structure and MALDI-TOF spectrum of IFS-TPE-1  $m/z = 6846.64$  (6848.83 theoretically).

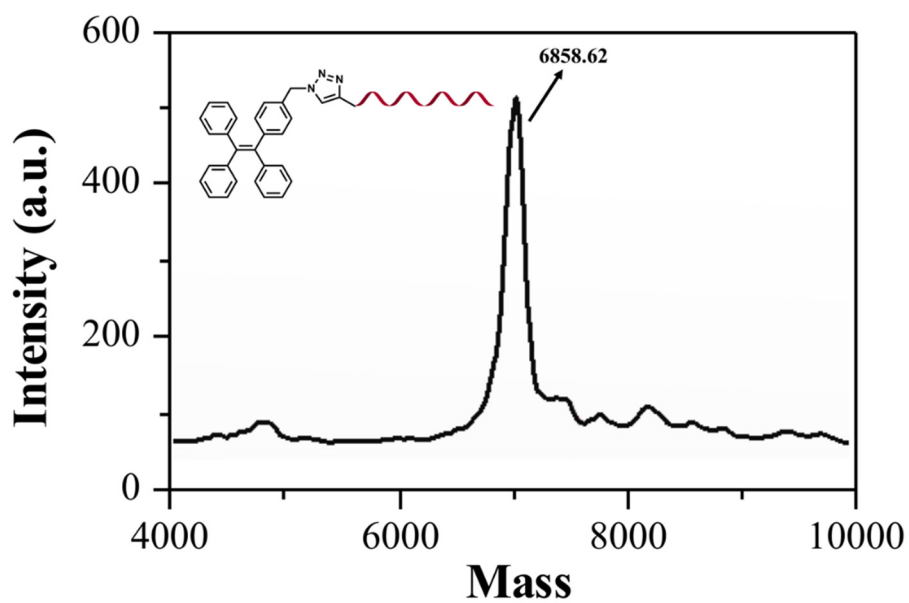

**Figure S3.** Chemical structure and MALDI-TOF spectrum of IFS-TPE-2  $m/z = 6858.62$  (6862.39 theoretically).

## 2. Absorption and CD characterizations.

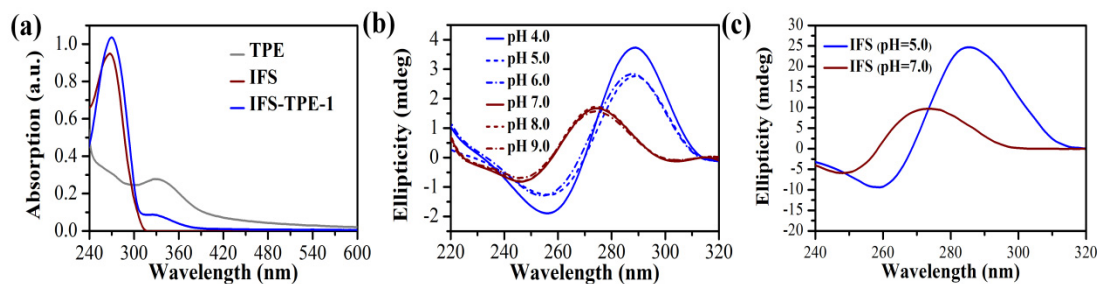

**Figure S4.** (a) The absorption spectra of TPE, IFS, and IFS-TPE-1. (b) The CD spectra of IFS-TPE-1 under different pH values. (c) The CD spectra of IFS strand at pH 7.0 and pH 5.0, respectively.

## 3. Gel electrophoresis analysis.

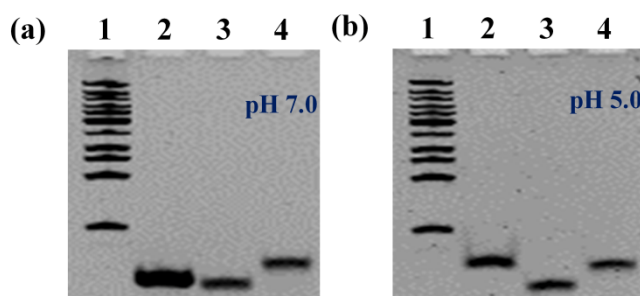

**Figure S5.** (a) and (b) The PAGE characterizations at pH 7.0 and pH 5.0, respectively; For both images: Lane 1: DNA marker; Lane 2: RS sequence; Lane 3: IFS sequence; Lane 4: IFS-TPE-1.

## 4. MTT assay.

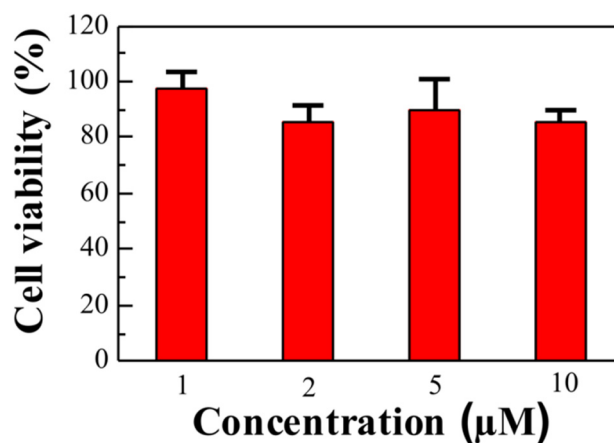

**Figure S6.** Cell viability (%) of HeLa cells treated with different concentrations of IFS-TPE-1 for 24 h by MTT assays. Data as mean values  $\pm$  SD ( $n = 3$ ).
